# Supplementary material for: Chemomodulatory Effect of the Marine-Derived Metabolite “Terrein” on the Anticancer Properties of Gemcitabine in Colorectal Cancer Cells
Source: MDPI journal article supplement (doi:10.3390/md21050271), 2023-04-26
Supplement: s1 [file s1]

(A)

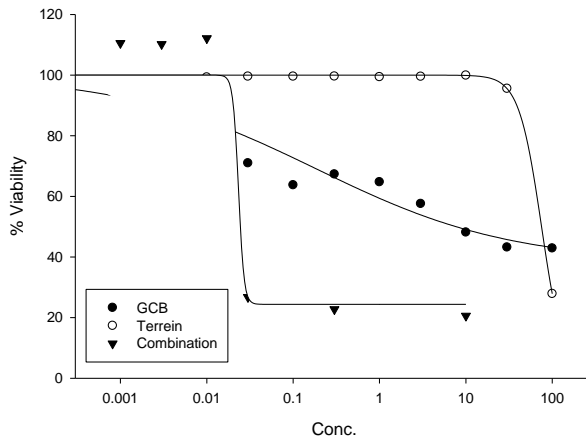

(B)

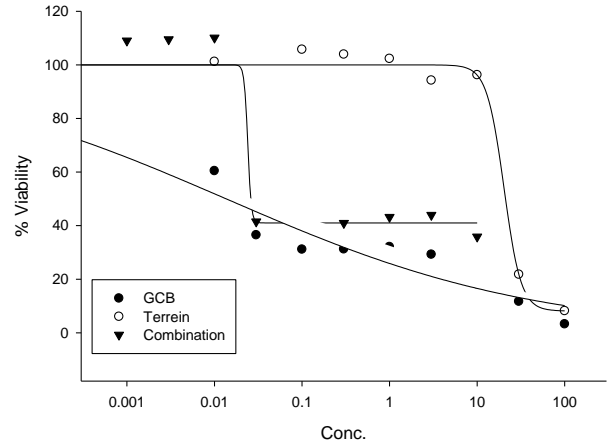

**Supp. Figure S1.** The effect of terrein on the cytotoxicity of GCB (A) in Normoxia and (B) in hypoxia in HCT-116 cell line. The cells were exposed to serial dilution of terrein (○), GCB (●) or Terr/GCB combination (▼) for 72 h. The cell viability was determined using SRB assay.

A)

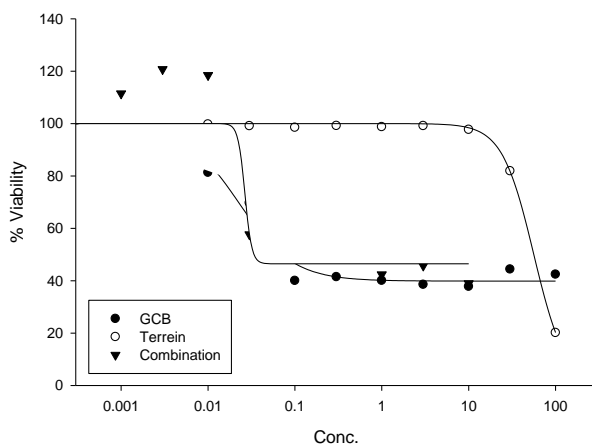

B)

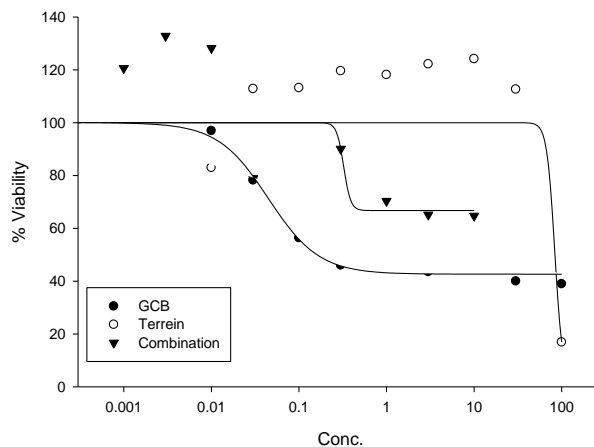

**Supp. Figure S2.** The effect of terrein on the cytotoxicity of GCB (A) in Normoxia and (B) in hypoxia in HT-29 cell line. The cells were exposed to serial dilution of terrein (○), GCB (●) or Terr/GCB combination (▼) for 72 h. The cell viability was determined using SRB assay.

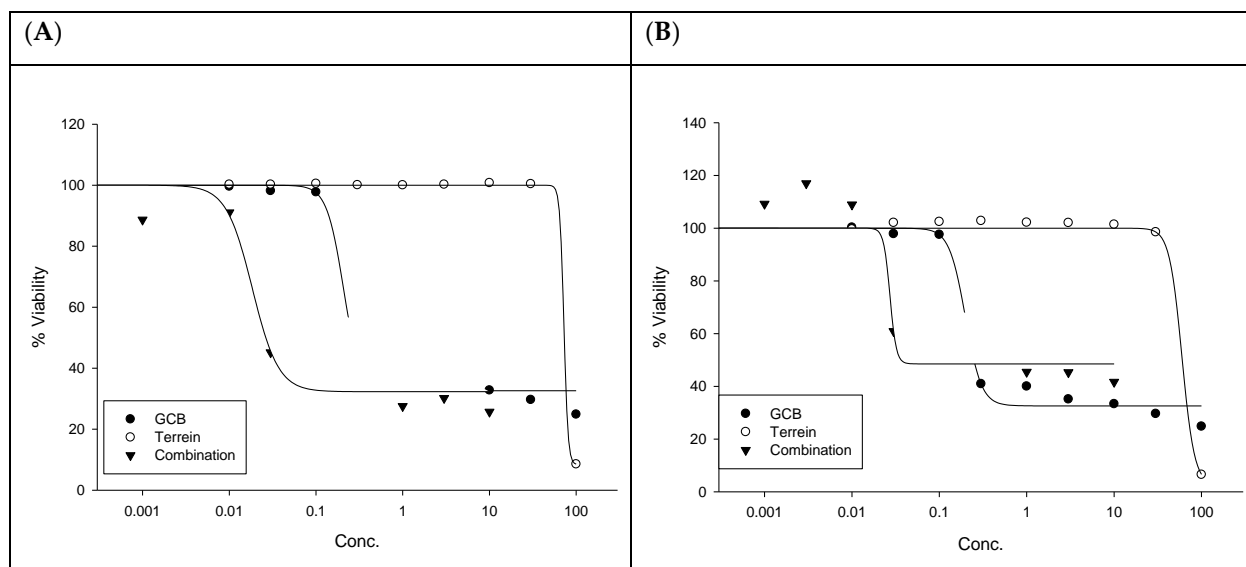

**Supp. Figure S3.** The effect of terrein on the cytotoxicity of GCB (A) in Normoxia and (B) in hypoxia in SW620 cell line. The cells were exposed to serial dilution of terrein (○), GCB (●) or Terr/GCB combination (▼) for 72 h. The cell viability was determined using SRB assay.
